# Supplementary material
Source: Springer Nature journal article supplement (https://www.springermedizin.de/resource/supplementary/12894_2006_92_MOESM1_ESM.pdf/9513940)
Supplement: MOESM1 [file 9513940]

| <b>Probeset</b> | <b>5D3_raw</b> | <b>5D3_std</b> | <b>Endo_raw</b> | <b>Endo_std</b> | <b>SP_raw</b> | <b>SP_std</b> | <b>Common</b> | <b>Genbank</b> |
|-----------------|----------------|----------------|-----------------|-----------------|---------------|---------------|---------------|----------------|
| 201873_s_at     | 743            | 267            | 420             | 147             | 30            | 84            | ABCE1         | NM_002940      |
| 209993_at       | 800            | 438            | 391             | 144             | 31            | 83            | ABCB1         | AF016535       |
| 208161_s_at     | 126            | 96             | 127             | 81              | 8             | 13            | ABCC3         | NM_020037      |
| 209247_s_at     | 236            | 116            | 250             | 125             | 22            | 32            | ABCF2         | BC001661       |
| 203192_at       | 103            | 33             | 68              | 22              | 15            | 13            | ABCB6         | NM_005689      |
| 209380_s_at     | 192            | 71             | 162             | 47              | 20            | 27            | ABCC5         | AF146074       |
| 204567_s_at     | 1241           | 256            | 331             | 257             | 105           | 98            | ABCG1         | NM_004915      |
| 218991_at       | 134            | 45             | 85              | 30              | 13            | 17            | ABC1          | NM_022070      |
| 202850_at       | 509            | 184            | 297             | 134             | 22            | 70            | ABCD3         | NM_002858      |
| 202394_s_at     | 136            | 51             | 108             | 32              | 13            | 19            | ABCF3         | NM_018358      |
| 209246_at       | 164            | 63             | 135             | 45              | 9             | 24            | ABCF2         | AF261091       |
| 207622_s_at     | 183            | 111            | 157             | 67              | 7             | 25            | ABCF2         | NM_005692      |
| 203196_at       | 291            | 112            | 251             | 74              | 22            | 43            | ABCC4         | AI948503       |
| 207623_at       | 156            | 44             | 56              | 21              | 6             | 12            | ABCF2         | NM_005692      |
| 211113_s_at     | 183            | 64             | 62              | 31              | 8             | 15            | ABCG1         | U34919         |
| 213353_at       | 159            | 53             | 114             | 35              | 7             | 20            | ABCA5         | BF693921       |
| 209735_at       | 3053           | 1000           | 1040            | 560             | 73            | 244           | ABCG2         | AF098951       |
| 201872_s_at     | 1027           | 252            | 480             | 168             | 48            | 96            | ABCE1         | AI002002       |
| 223320_s_at     | 194            | 63             | 110             | 55              | 6             | 24            | ABCB10        | AF277184       |

ABC genes >100 ANOVA

5D3 vs SP 04-04-06
